# Supplementary material for: Non-invasive Sampling of Odours From Two Big Cats for Wildlife Conservation
Source: Research Square preprint supplement (doi:10.21203/rs.3.rs-8895773/v1), 2026-02-24
Supplement: Supplementary file 1 [file 78b29958a4ec3fc9be7df69f.docx]

**Supplementary tables:**

**Supplementary Table 1: Details of permit letters**

| **Sr. No.** | **Authority** | **Permit number** | **Date** |
| --- | --- | --- | --- |
| 1 | Central Zoo Authority (CZA) | F. No. 9-3/2005-CZA (Vol. IV) (NS)/2344/2020 | 28th February,2020 |
| 2 | The Chief Wildlife Warden, Government of Karnataka | PCCF(WL)/E2/CR-28/2017-18 | 19th March,2020 |
| 3 | Deputy Inspector General of Forests(WL) | F.No.1-18/2020 WL | May,2020 |
| 4 | Bannerghatta Biological Park | No.A3/BBP/Sample Collection/GL-1/2020-21 | 22nd June,2020 |
| 5 | Chief Wildlife Warden, Rajasthan Forest Department | No. F. 19 (Uma) Permission/cwlw/2021/8333 | 9th January, 2023 |
| 6 | Chief Wildlife Warden, Rajasthan Forest Department | No. F. 19 (Uma) Permission/cwlw/2017/ | 4th November, 2019 |
| 7 | Gujarat State Forest Department | WLP/RTC/28/C/378-381/2020-21 |  |

**Supplementary Table 2: Details of zoo samples with number of replicates**

| **Id** | **Species** | **Age** | **Sex** | **Zoo** | **Urine replicates** | **Scat replicates** |
| --- | --- | --- | --- | --- | --- | --- |
| **BBP_Tig-01** | Tiger | 10 | M | BBP | 5 | 4 |
| **BBP_Tig-02** | Tiger | 10 | M | BBP | 5 | 5 |
| **BBP_Tig-03** | Tiger | 4 | F | BBP | 5 | 5 |
| **BBP_Tig-04** | Tiger | 4 | F | BBP | 4 | 4 |
| **BBP_Tig-05** | Tiger | 2 | M | BBP | 5 | 5 |
| **BDZ_Tig-01** | Tiger | 16 | F | BDZ | 5 | 2 |
| **BDZ_Tig-02** | Tiger | 16 | M | BDZ | 4 | 1 |
| **KNZ_Tig-01** | Tiger | 4 | F | KNZ | 1 | 2 |
| **KNZ_Tig-02** | Tiger | 16 | M | KNZ | 1 | 2 |
| **BBP_Leo-01** | Leopard | 11 | M | BBP | 5 | 0 |
| **BBP_Leo-02** | Leopard | 11 | F | BBP | 5 | 2 |
| **BBP_Leo-03** | Leopard | 4 | M | BBP | 5 | 5 |
| **BBP_Leo-04** | Leopard | 3 | F | BBP | 5 | 0 |
| **BBP_Leo-05** | Leopard | 7 | M | BBP | 5 | 0 |
| **BDZ_Leo-01** | Leopard | 17 | M | BDZ | 1 | 1 |
| **BDZ_Leo-02** | Leopard | 11 | M | BDZ | 2 | 0 |
| **BDZ_Leo-03** | Leopard | 16 | M | BDZ | 2 | 0 |
| **BDZ_Leo-04** | Leopard | 9 | F | BDZ | 5 | 2 |
| **BDZ_Leo-05** | Leopard | 9 | F | BDZ | 1 | 1 |
| **KNZ_Leo-01** | Leopard | 9 | M | KNZ | 1 | 2 |
| **KNZ_Leo-02** | Leopard | 11 | M | KNZ | 1 | 2 |
| **KNZ_Leo-03** | Leopard | 10 | M | KNZ | 1 | 0 |
| **KNZ_Leo-04** | Leopard | 19 | M | KNZ | 0 | 1 |
| **KNZ_Leo-05** | Leopard | 6.5 | F | KNZ | 0 | 1 |
| **KNZ_Leo-06** | Leopard | 6 | F | KNZ | 0 | 1 |

**Supplementary Table 3: Details of wild tiger samples with number of replicates**

| **Sr.No** | **Sample Id** | **Number of replicates** | **Sex** | **Age** | **Reproductive characters (number of replicates)** |
| --- | --- | --- | --- | --- | --- |
| **1** | **T101** | 2 | Male | Young |  |
| **2** | **T102** | 8 | Female | Young |  |
| **3** | **T103** | 3 | Female | Young |  |
| **4** | **T105** | 5 | Female | Young |  |
| **5** | **T108** | 2 | Male | Young |  |
| **6** | **T110** | 5 | Male | Young |  |
| **7** | **T112** | 9 | Male | Young |  |
| **8** | **T114** | 2 | Female | Young |  |
| **9** | **T119** | 1 | Female | Young |  |
| **10** | **T120** | 5 | Male | Young |  |
| **11** | **T121** | 7 | Male | Young |  |
| **12** | **T124** | 5 | Female | Young | Lactating (1) |
| **13** | **T125** | 6 | Female | Young |  |
| **14** | **T127** | 2 | Female | Young |  |
| **15** | **T134** | 3 | Female | Young |  |
| **16** | **T19** | 2 | Female | Old |  |
| **17** | **T39** | 13 | Female | Old | Pregnant (10) |
| **18** | **T41** | 8 | Female | Old |  |
| **19** | **T57** | 4 | Male | Young |  |
| **20** | **T58** | 1 | Male | Old |  |
| **21** | **T60** | 6 | Female | Old |  |
| **22** | **T63** | 8 | Female | Old |  |
| **23** | **T66** | 2 | Male | Old |  |
| **24** | **T8** | 10 | Female | Old |  |
| **25** | **T84** | 8 | Female | Young | Pregnant (3) |
| **26** | **T86** | 6 | Male | Young |  |
| **27** | **T93** | 6 | Female | Young | Lactating (4) |
| **28** | **T94** | 5 | Female | Young | Lactating (3) |

**Supplementary Table 4:** **Final sample sizes for each analysis**

| **Urine** |  |
| --- | --- |
| **Leopard** | **Tiger** |
| 38 | 32 |
| **Scat** |  |
| **Leopard** | **Tiger** |
| 18 | 30 |
| **Leopard Urine** |  |
| **Female** | **Male** |
| 16 | 22 |
| **Old** | **Young** |
| 16 | 22 |
| **Leopard scats** |  |
| **Female** | **Male** |
| 9 | 9 |
| **Old** | **Young** |
| 6 | 12 |
| **Tiger urine*** |  |
| **Female** | **Male** |
| 51 | 21 |
| **Old** | **Young** |
| 34 | 35 |
| **Tiger scats** |  |
| **Female** | **Male** |
| 13 | 17 |
| **Old** | **Young** |
| 14 | 16 |

*****Samples used for each random forest run. The total number of samples were higher since some samples had multiple technical replicates

**Supplementary Table 5: Compounds identified from both leopard and tiger urine**

Identification criteria: A-NIST matches, B-Retention index match, C-authentic standard match

| Sr. No. | Compound name | Base Peak | Kovat's Retention Index | Calculated Kovat's Retention Index | Identification Criteria |
| --- | --- | --- | --- | --- | --- |
| 1 | Cyclohexanone, 4-methyl- | 55 | 959 | 960.6 | AB |
| 2 | Dimethyl trisulfide | 126 | 970 | 979.9 | ABC |
| 3 | Heptanoic acid | 60 | 1078 | 1042 | AB |
| 4 | Unidentified | 86 |  |  | AB |
| 5 | Phenol | 94 | 980 | 983 | ABC |
| 6 | N-isopentylidene isopentylamine | 98 | 1047 | 1039 | AB |
| 7 | Phenylethyl alcohol | 91 | 1116 | 1109 | ABC |
| 8 | Adamantane-like | 94 | 1221 | 1169 | A |
| 9 | Nonanol | 56 | 1173 | 1170.89 | ABC |
| 10 | δ-Valerolactam | 99 | 1174 | 1188 | ABC |
| 11 | 2-Decanone | 58 | 1193 | 1191 | ABC |
| 12 | Tridecanoic acid | 73 | 1666 | 1305.05 | AB |
| 13 | n-Decanoic acid | 60 | 1373 | 1310.1 | AB |
| 14 | Dimethyl tetrasulphide | 79 | 1234 | 1213 | AB |
| 15 | Indole | 117 | 1295 | 1293.14 | ABC |
| 16 | Undecanoic acid | 60 | 1475 | 1399.61 | AB |
| 17 | n-Decanoic acid | 60 | 1373 | 1402.04 | AB |
| 18 | Unidentified | 69 |  |  | AB |
| 19 | Heptanoic acid | 60 | 1078 | 1448.77 | AB |
| 20 | Hexanoic acid | 60 | 990 | 1454.92 | AB |
| 21 | N-isopentylidene isopentylamine | 118 | 1392 | 1371.57 | AB |
| 22 | Acenaphthene | 153 | 1486 | 1451.12 | AB |
| 23 | Dodecanoic acid | 60 | 1568 | 1597.84 | ABC |
| 24 | Undecanoic acid | 60 | 1475 | 1609.95 | AB |
| 25 | 2,4-Di-tert-Butyl Phenol | 191 | 1519 | 1476.84 | AB |
| 26 | γ-Dodecalactone | 85 | 1678 | 1681.82 | ABC |
| 27 | Heptadecane | 57.1 | 1700 | 1698.64 | AB |
| 28 | Myristic acid | 73 |  | 1768 | AB |
| 29 | Tetradecanoic acid | 73 | 1768 | 1791.87 | AB |
| 30 | cis-9-Hexadecenal | 57.1 |  | 1780 | AB |
| 31 | 1-Hexadecanol | 55 | 1880 | 1882.74 | AB |
| 32 | n-Nonadecanol-1 | 83.1 |  |  | AB |
| 33 | δ-Tetradecalactone | 99 | 1938 | 1935.34 | AB |
| 34 | n-Hexadecanoic acid | 73 | 1968 | 1994.83 | AB |
| 35 | Dodecanamide,N-3-methylbutyl | 129 | 2117 | 2110.17 | AB |
| 36 | trans-13-Octadecenoic acid | 55 | 2164 | 2167.8 | AB |
| 37 | Octadecanoic acid | 73 | 2172 | 2186.44 | AB |
| 38 | Nonyl 2-methylbutanoate | 103 | 1518 | 1586.51 | AB |
| 39 | 2,2,4-Trimethyl-1,3-pentanediol diisobutyrate | 71 | 1588 | 1594.71 | AB |
| 40 | Diisooctyl phthalate | 149 | 2543 | 2560.42 | AB |
| 41 | Squalene | 69 | 2832 | 2832 | AB |
| 42 | Heptadecane | 57 | 1700 | 1704.39 | AB |

**Supplementary Table 6: Compounds identified from both leopard and tiger scats.**

Identification criteria: A-NIST matches, B-Retention index match, C-authentic standard match

| Sr. No. | Compound name | Base peak | Kovat’s Retention Index | Calculated Kovat's Retention Index | Identification Criteria |
| --- | --- | --- | --- | --- | --- |
| 1 | Methoxy acetic acid | 45 | 752 | 796.85 | AB |
| 2 | Propane, 1-(ethenylthio)- | 60 | 794 | 796.7 | AB |
| 3 | Butanoic acid | 60 | 805 | 814.5 | AB |
| 4 | α-Methylbutyric acid | 74 | 861 | 819.6 | AB |
| 5 | Pentanoic acid | 60 | 903 | 821.2 | AB |
| 6 | 3-Methylpentanoic acid | 60 | 947 | 900 | AB |
| 7 | Isovaleric acid | 60 | 919 | 933.6 | ABC |
| 8 | Decane | 57 | 1000 | 996.1 | AB |
| 9 | (+)-m-Mentha-1(6),8-diene | 57.1 | 1038 | 1036.73 | AB |
| 10 | Dimethyl trisulphide | 126 | 970 | 973 | AB |
| 11 | 3,7-Dimethylnonane | 105 | 1040 | 1052.1 | AB |
| 12 | p-Propyltoluene | 57 | 1057 | 1056.25 | AB |
| 13 | Phenol | 94 | 980 | 983 | ABC |
| 14 | 5-Methyldecane | 57 | 1058 | 1062.68 | AB |
| 15 | 2,6,7-Trimethyldecane | 57 | 1071 | 1069.34 | AB |
| 16 | 3-Methyldecane | 119.2 | 1080 | 1079.71 | AB |
| 17 | m-Xylene, 2-ethyl- | 105 | 1065 | 1084.56 | AB |
| 18 | Acetophenone | 51.1 | 1100 | 1098 | AB |
| 19 | Undecane | 57.1 | 1104 | 1108.65 | AB |
| 20 | 2-ethylhexanol | 57 | 1112 | 1032 | AB |
| 21 | n-Nonaldehyde | 83.2 | 1135 | 1149.45 | AB |
| 22 | 5-Ethyldecane | 57.1 | 1139 | 1133.82 | AB |
| 23 | Hexylcyclopentane | 69.1 | 1136 | 1137.09 | AB |
| 24 | 3,5-Diethyltoluene | 133.1 | 1147 | 1145.82 | AB |
| 25 | Hexadecane | 57 | 1600 | 1154.47 | AB |
| 26 | p-cresol | 107 | 1077 | 1075.66 | ABC |
| 27 | 2-Methyl-2-phenylpentane | 119 | 1168 | 1169.2 | AB |
| 28 | 3-Methylundecane | 57 | 1170 | 1170.73 | AB |
| 29 | Naphthalene | 128.1 | 1182 | 1184.58 | AB |
| 30 | 1,4-Diethylhexyl butyrate | 71 | 1190 | 1196.65 | AB |
| 31 | Phenylethyl alcohol | 91 | 1116 | 1109 | ABC |
| 32 | Dodecane | 57.1 | 1200 | 1199.45 | AB |
| 33 | 2,6-Dimethylundecane | 57.1 | 1210 | 1211.75 | AB |
| 34 | 6-Ethylundecane | 57.1 | 1230 | 1214.1 | AB |
| 35 | 6-Methyldodecane | 57.1 | 1251 | 1248.81 | AB |
| 36 | 3-Methyldodecane | 57.1 | 1271 | 1271.27 | AB |
| 37 | 2,6,11-Trimethyldodecane | 57.1 | 1275 | 1273.32 | AB |
| 38 | δ-Valerolactam | 99 | 1174 | 1188 | ABC |
| 39 | Indole | 117 | 1295 | 1292.91 | ABC |
| 40 | Dimethyl tetrasulphide | 79 | 1234 | 1213 | AB |
| 41 | 2-Ethyl-3-hydroxyhexyl 2-methylpropanoate | 71 | 1373 | 1377.78 | AB |
| 42 | Tetradecane | 57 | 1400 | 1401.64 | AB |
| 43 | β Ionol | 161 | 1428 | 1427.17 | AB |
| 44 | .(+)-α-Barbatene | 117 | 1436 | 1436.35 | AB |
| 45 | 2,6,10-Trimethyltridecane | 71.1 | 1449 | 1463.81 | AB |
| 46 | 2-Dodecanone | 58 | 1396 | 1352 | ABC |
| 47 | Pentadecane | 57 | 1500 | 1499.26 | AB |
| 48 | 2,4-Di-tert-Butyl Phenol | 191 | 1519 | 1522.16 | AB |
| 49 | Benzene, (1-butylhexyl)- | 91 | 1535 | 1540.17 | AB |
| 50 | Decane, 4-phenyl- | 91 | 1546 | 1551.25 | AB |
| 51 | Decane, 3-phenyl- | 91 | 1568 | 1568.32 | AB |
| 52 | Decane, 2-phenyl | 105 | 1607 | 1605.61 | AB |
| 53 | Undecane, 6-phenyl- | 91 | 1628 | 1634.71 | AB |
| 54 | Undecane, 5-phenyl- | 91 | 1632 | 1634.71 | AB |
| 55 | Undecane, 4-phenyl- | 91 | 1643 | 1648.42 | AB |
| 56 | Decylcyclohexane | 83 | 1656 | 1656.33 | AB |
| 57 | 3-Phenylundecane | 91 | 1667 | 1668.78 | AB |
| 58 | Heptadecane | 57 | 1700 | 1702.01 | AB |
| 59 | Undecane, 2-phenyl- | 105 | 1708 | 1706.17 | AB |
| 60 | Dodecane, 6-phenyl- | 91 | 1726 | 1731.91 | AB |
| 61 | 3-Phenyldodecane | 91 | 1766 | 1772.44 | AB |
| 62 | Octadecane | 57 | 1800 | 1803.57 | AB |
| 63 | γ-Dodecalactone | 85 | 1613 | 1613.2 | ABC |
